# Supplementary material for: A fluorescence on–off sensor for Cu2+and its resultant complex as an off–on sensor for Cr3+in aqueous media
Source: Royal Society of Chemistry journal article supplement (doi:10.1039/c5ra13782a), 2015-01-01
Supplement: c5ra13782a1.pdf [file c5ra13782a1.pdf]

## *Supporting information*

### **A fluorescence on-off sensor for Cu<sup>2+</sup> and its resultant complex as off-on sensor for Cr<sup>3+</sup> in aqueous media**

Yunling Gao<sup>a\*</sup>, Jieming Shu<sup>a</sup>, Cong Zhang<sup>a</sup>, Xiang Zhang<sup>b</sup>, Haiyan Chen<sup>c\*\*</sup>, Kejian Yao<sup>a\*</sup>

<sup>a</sup> *State Key Laboratory Breeding Base of Green Chemistry Synthesis Technology, College of Chemical Engineering, Zhejiang University of Technology, Hangzhou 310032, China.*

<sup>b</sup> *School of Chemistry and Materials Science, Shanxi Normal University, Linfen 041004, China.*

<sup>c</sup> *Department of Biomedical Engineering, School of Life Science and Technology, State Key Laboratory of Natural Medicines, China Pharmaceutical University, Nanjing 210009, China.*

**\*E-mail:** [gaoyl@zjut.edu.cn](mailto:gaoyl@zjut.edu.cn); [yaokj@zjut.edu.cn](mailto:yaokj@zjut.edu.cn), **Tel:** +86-571-88320951;

**\*\*Email:** [chenhaiyan@cpu.edu.cn](mailto:chenhaiyan@cpu.edu.cn), **Tel:** +86-25-83271080

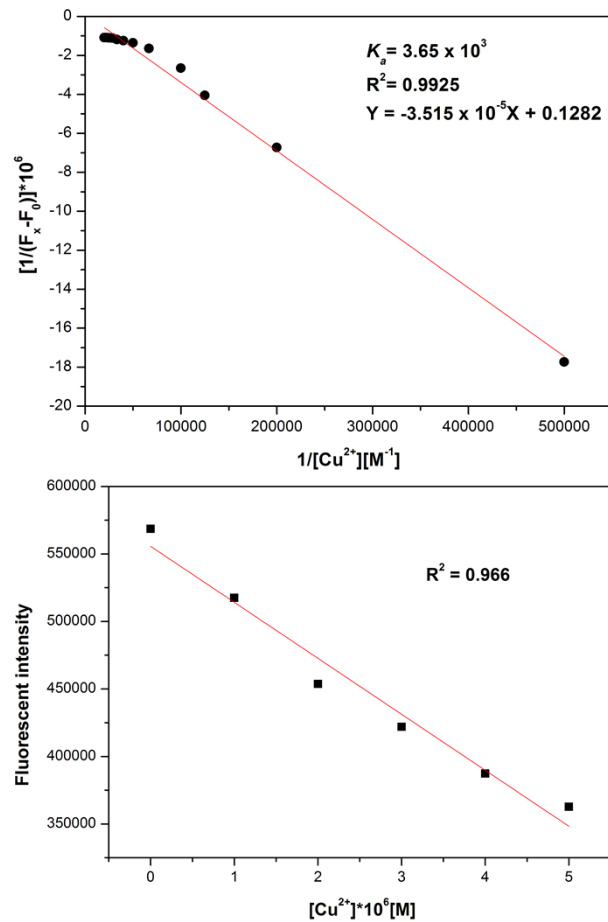

**Fig. S1.** Benesi-Hildebrand plot of the sensor **1** and  $Cu^{2+}$  (top) and the linear fitting of the fluorescence intensity of the sensor **1** toward the concentration of  $Cu^{2+}$  (bottom).

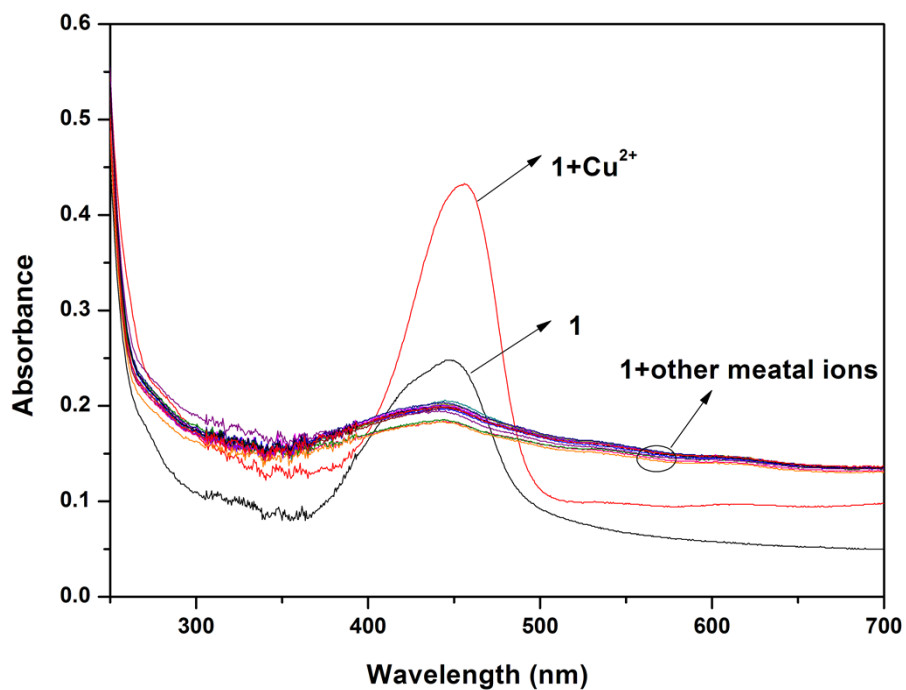

**Fig. S2.** Absorption changes of the sensor **1** (10  $\mu$ M) upon addition of 3.0 equiv. of individual metal ions in 0.1 M HEPES-DMSO (9:1, v/v, pH = 7.2) solution.

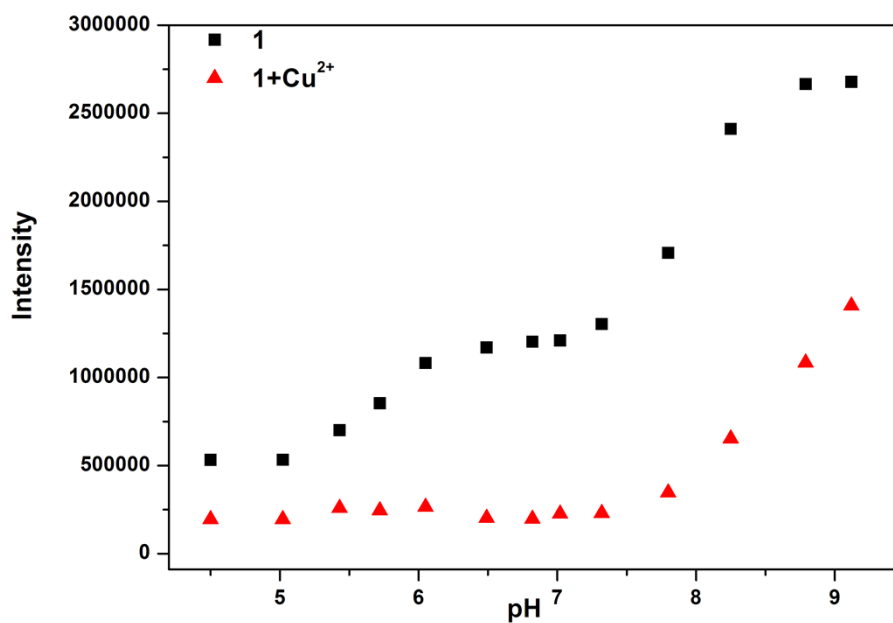

**Fig. S3.** Influences of pH on the fluorescence intensity of the sensor **1** (10  $\mu\text{M}$ ) and the sensor **1** plus  $\text{Cu}^{2+}$  (30  $\mu\text{M}$ ) in 0.1 M HEPES-DMSO (9:1, v/v, pH = 7.2) solution.

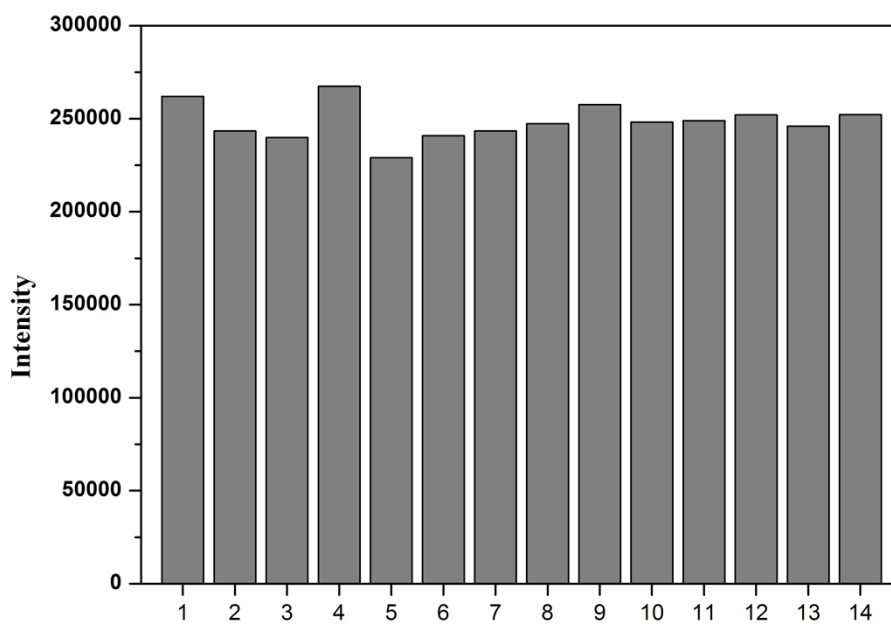

**Fig. S4.** Fluorescence response of the sensor **1** (10  $\mu\text{M}$ ) and  $\text{Cu}^{2+}$  (30  $\mu\text{M}$ ) in the presence of other different metal ions (30  $\mu\text{M}$ ) in 0.1 M HEPES-DMSO (9:1, v/v, pH = 7.2) solution. 1:  $\text{Cu}^{2+}$ , 2:  $\text{Zn}^{2+}$ , 3:  $\text{Al}^{3+}$ , 4:  $\text{Na}^+$ , 5:  $\text{Fe}^{3+}$ , 6:  $\text{Ca}^{2+}$ , 7:  $\text{Ag}^+$ , 8:  $\text{Cd}^{2+}$ , 9:  $\text{K}^+$ , 10:  $\text{Mg}^{2+}$ , 11:  $\text{Ni}^{2+}$ , 12:  $\text{Co}^{2+}$ , 13:  $\text{Pb}^{2+}$ , 14:  $\text{Hg}^{2+}$ .

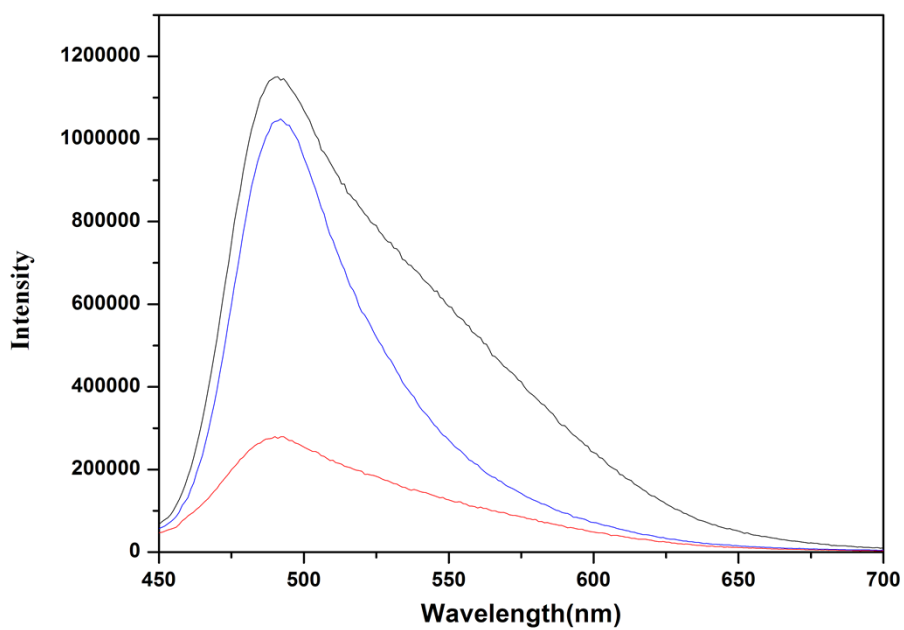

**Fig. S5.** Fluorescence changes of the sensor **1** (10  $\mu\text{M}$ ) upon sequential addition of 3.0 equiv. of  $\text{Cu}^{2+}$  and 3.0 equiv. of  $\text{Cr}^{3+}$  in 0.1 M HEPES-DMSO (9:1, v/v, pH = 7.2) solution (dark line for the sensor **1**, red line for 1+ $\text{Cu}^{2+}$ , blue line for 1+ $\text{Cu}^{2+}$ + $\text{Cr}^{3+}$ ).

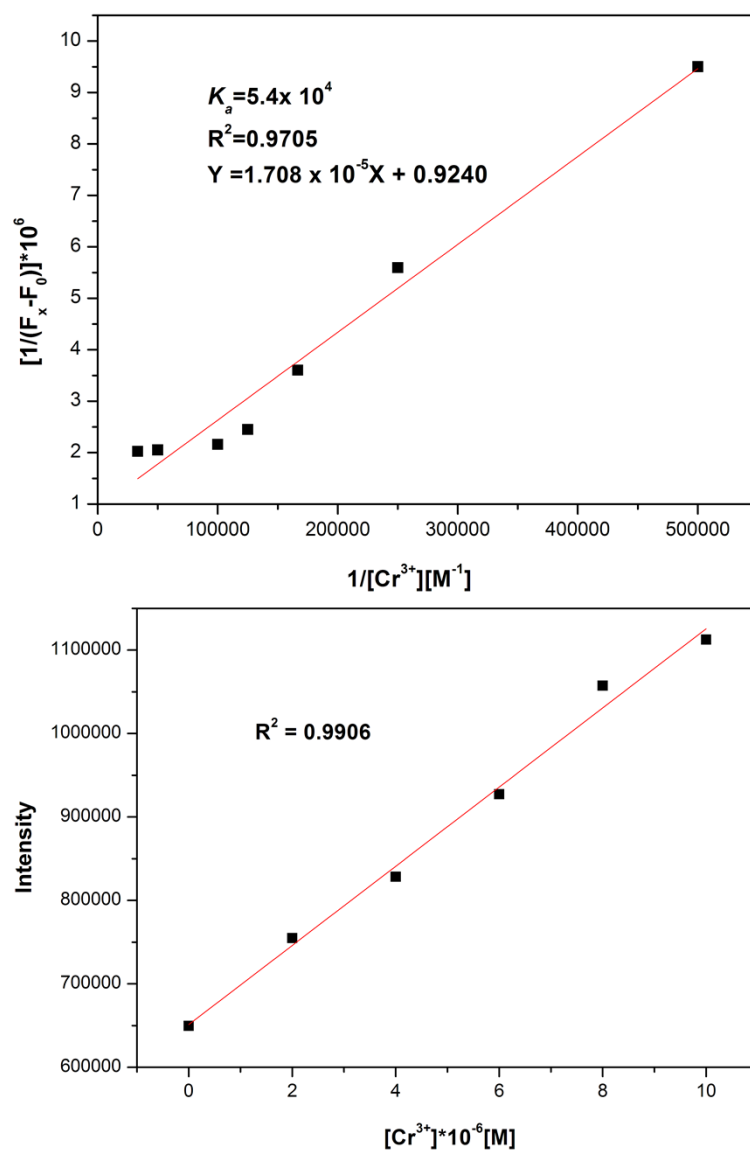

**Fig. S6.** Benesi-Hildebrand plot of 1-Cu<sup>2+</sup> with Cr<sup>3+</sup> (top) and the linear fitting of the fluorescence intensity of 1-Cu<sup>2+</sup> toward the concentration of Cr<sup>3+</sup> (bottom).

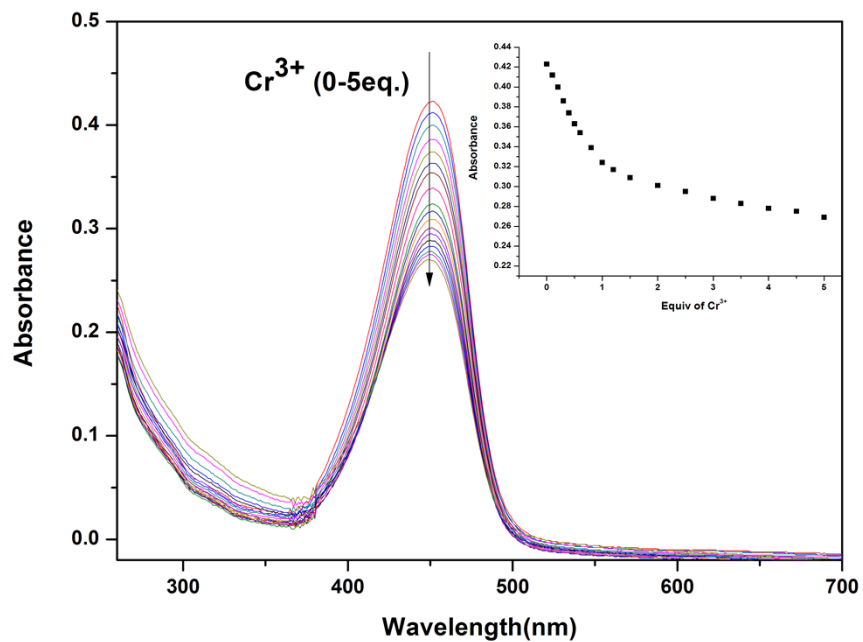

**Fig. S7.** Absorption changes of 1-Cu<sup>2+</sup> (13 μM) upon addition of different equivalents of Cr<sup>3+</sup> (0, 0.1, 0.2, 0.3, 0.4, 0.5, 0.6, 0.8, 1.0, 1.2, 1.5, 2.0, 2.5, 3.0, 3.5, 4.0, 4.5, 5.0 equiv.) in 0.1 M HEPES-DMSO (9:1, v/v, pH = 7.2) solution. Inset: a plot of the maximum absorption change at 451 nm against different equivalents of Cr<sup>3+</sup>.



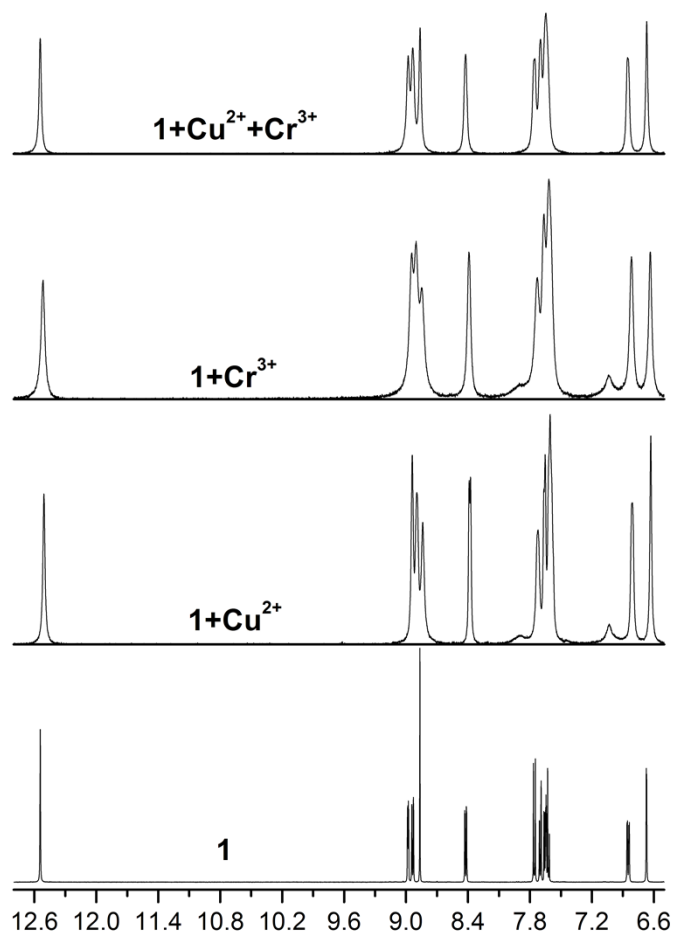

**Fig. S8.**  $^1\text{H}$  NMR spectra of the sensor **1** in the presence of  $\text{Cu}^{2+}$  and  $\text{Cr}^{3+}$  in  $\text{DMSO-d}_6$ .

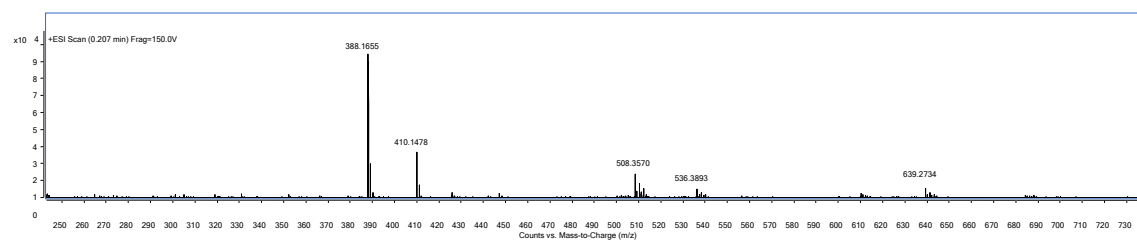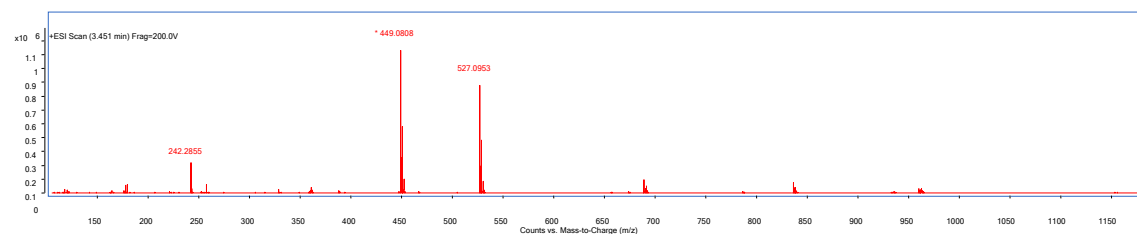

**Fig. S9.** HRMS for the sensor **1** (top) and **1-Cu<sup>2+</sup>** complex (bottom).

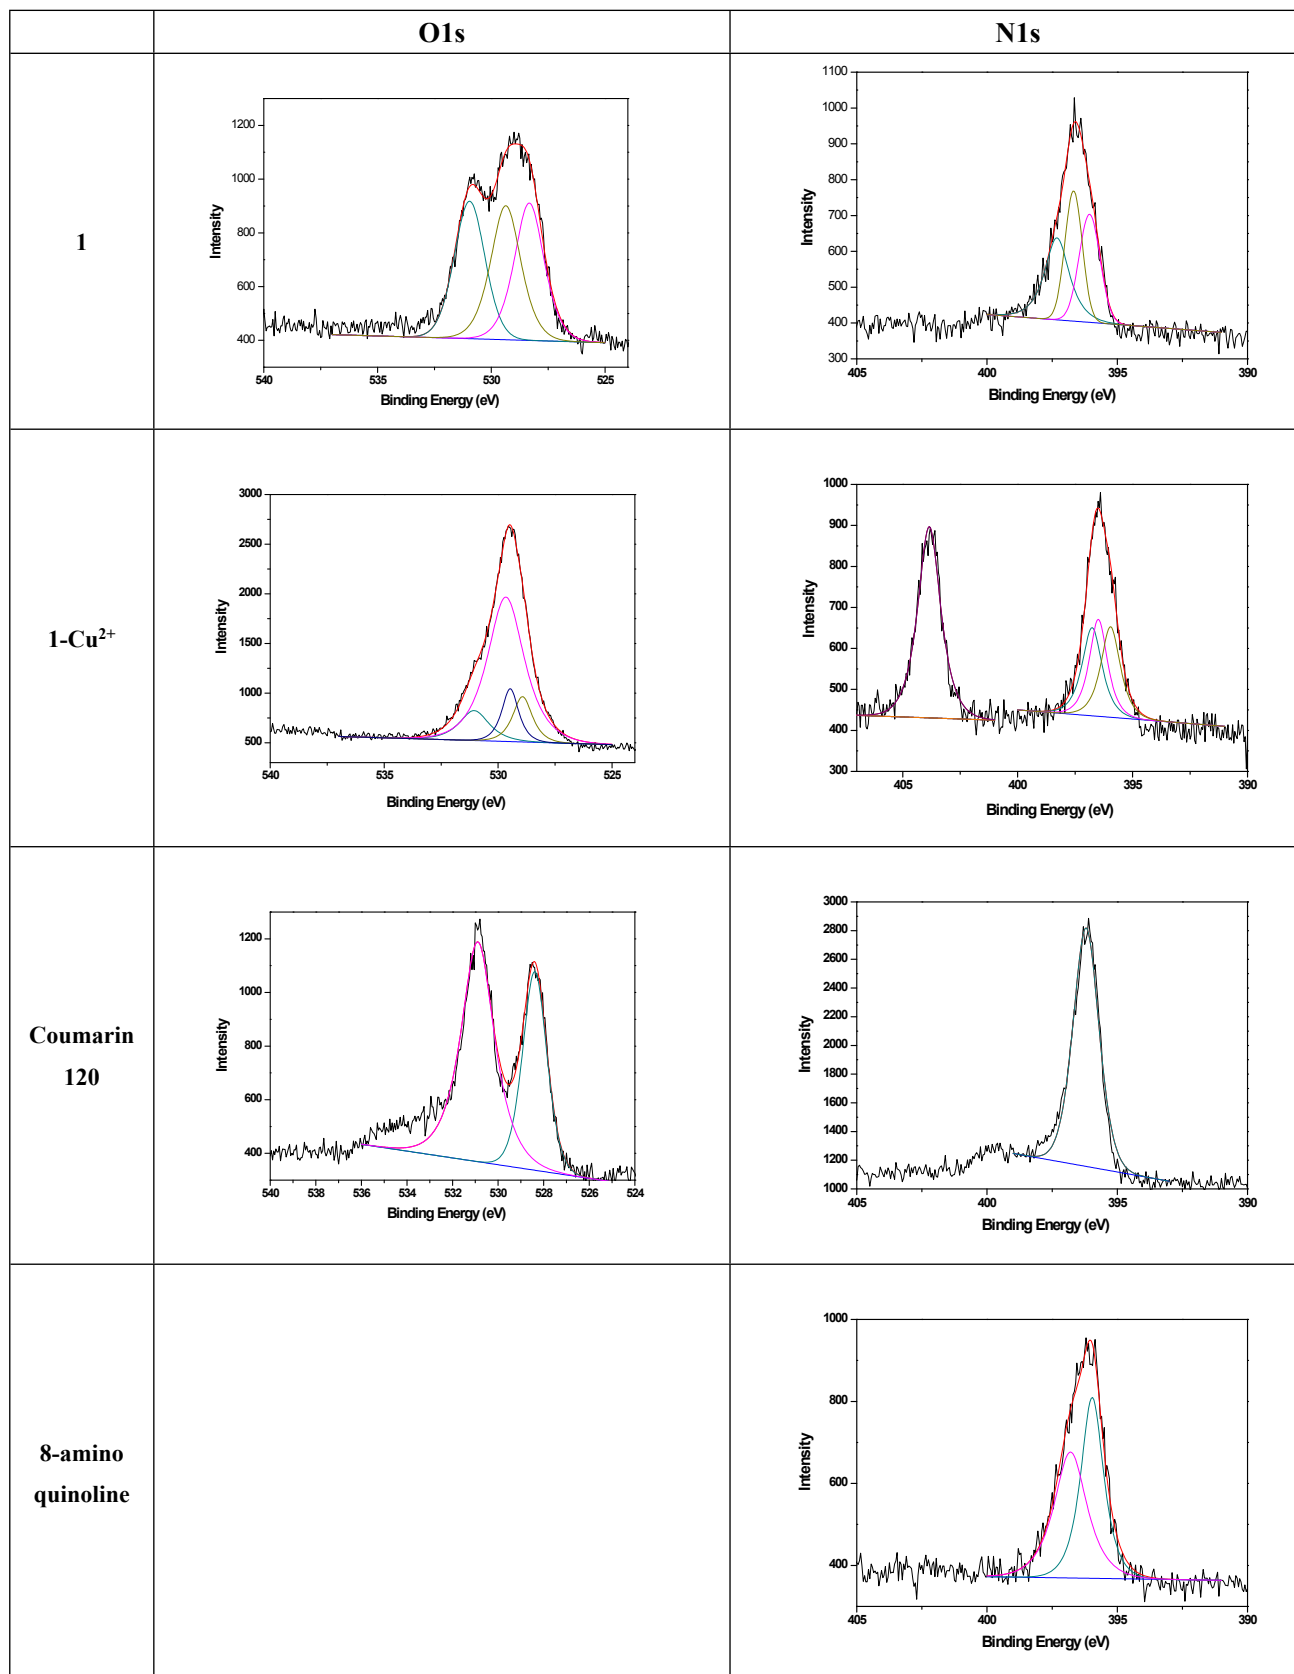

Fig. S10. XPS spectra of O1s and N1s of the sensor **1** and **1-Cu<sup>2+</sup>**.

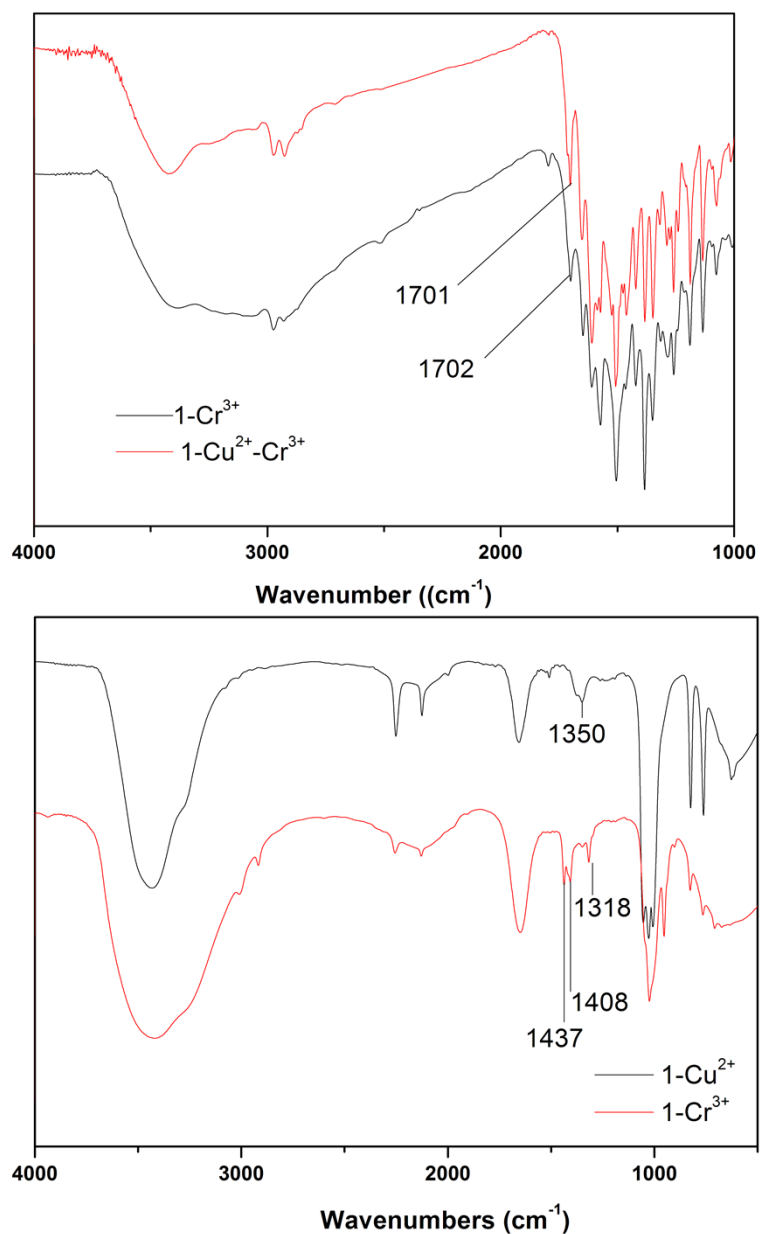

**Fig. S11.** FT-IR spectra of 1-Cu<sup>2+</sup> with Cr<sup>3+</sup> and 1-Cr<sup>3+</sup> using the KBR compression method (top); FT-IR spectra of 1-Cu<sup>2+</sup> and 1-Cr<sup>3+</sup> in DMSO (bottom).

DFT-optimized structure of the sensor 1

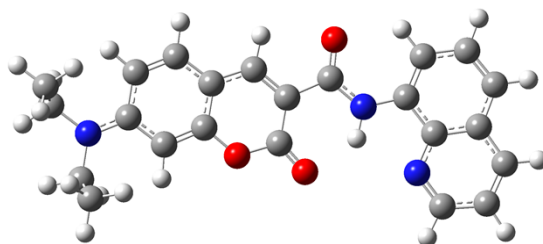

Cartesian coordinate:

|   |             |             |             |
|---|-------------|-------------|-------------|
| C | 4.55318900  | -1.50332600 | -0.21714800 |
| C | 3.27519300  | -2.00768900 | -0.15992600 |
| C | 2.14686700  | -1.16411900 | -0.15175500 |
| C | 2.38765400  | 0.22133600  | -0.20055000 |
| C | 3.66394200  | 0.75434900  | -0.25696100 |
| C | 4.79034600  | -0.09662600 | -0.28136300 |
| H | 0.56650000  | -2.65882400 | -0.04796200 |
| H | 5.38119800  | -2.19581800 | -0.21057400 |
| H | 3.12506000  | -3.08089800 | -0.11596800 |
| C | 0.79973400  | -1.60006400 | -0.08937200 |
| H | 3.74971600  | 1.82972800  | -0.27873300 |
| C | 0.00721800  | 0.70831200  | -0.13168500 |
| C | -0.25014600 | -0.72579500 | -0.07925500 |
| N | 6.06579900  | 0.40873200  | -0.37573500 |
| C | 7.23689800  | -0.47135700 | -0.38772100 |
| H | 8.04385100  | 0.07894100  | -0.87616900 |
| H | 7.03195300  | -1.33155800 | -1.03063600 |
| C | 6.30308700  | 1.85367200  | -0.43068800 |
| H | 7.27099400  | 2.00138600  | -0.91450400 |
| H | 5.56377100  | 2.30946800  | -1.09492100 |
| O | -0.80433300 | 1.60255200  | -0.13141200 |
| C | -1.63061300 | -1.32202200 | -0.01089900 |
| O | -1.76087000 | -2.53992400 | 0.03729500  |
| O | 1.34793300  | 1.09912700  | -0.18794600 |
| N | -2.67460600 | -0.43871900 | -0.00717500 |
| H | -2.45733600 | 0.55898000  | -0.05229400 |
| C | -4.03666800 | -0.74111900 | 0.05334300  |
| C | -4.92425300 | 0.39015700  | 0.03689800  |
| C | -4.57290200 | -2.01581500 | 0.12694400  |
| C | -6.33388500 | 0.18120400  | 0.09756500  |
| C | -5.97183800 | -2.19902300 | 0.18586200  |
| H | -3.90826300 | -2.86462600 | 0.13865200  |
| C | -5.16911000 | 2.67336800  | -0.05260100 |
| C | -7.15322600 | 1.33602500  | 0.07816600  |

|   |             |             |             |
|---|-------------|-------------|-------------|
| C | -6.84373500 | -1.13871600 | 0.17264500  |
| H | -6.35455900 | -3.21204700 | 0.24289600  |
| C | -6.57798900 | 2.58035000  | 0.00351400  |
| H | -4.68795700 | 3.64622300  | -0.11239100 |
| H | -8.23146000 | 1.22071300  | 0.12259700  |
| H | -7.91616900 | -1.29364900 | 0.21829800  |
| H | -7.17998200 | 3.48110800  | -0.01314700 |
| N | -4.37216400 | 1.62730100  | -0.03673800 |
| C | 6.29773500  | 2.56240200  | 0.92966000  |
| H | 7.09538300  | 2.18654500  | 1.57411300  |
| H | 6.45280900  | 3.63629000  | 0.79126500  |
| H | 5.34888400  | 2.42246500  | 1.45118900  |
| C | 7.70572300  | -0.94404800 | 0.99428500  |
| H | 8.56630800  | -1.61120300 | 0.88921000  |
| H | 8.00704600  | -0.10046400 | 1.61882900  |
| H | 6.91788100  | -1.48674800 | 1.52054600  |
